# Supplementary material for: From flexible to mesoporous polybenzoxazine resins templated by poly(ethylene oxide-b-ε-caprolactone) copolymer through reaction induced microphase separation mechanism
Source: Royal Society of Chemistry journal article supplement (doi:10.1039/c3ra23447a), 2013-01-01
Supplement: c3ra23447a.pdf [file c3ra23447a.pdf]

# **From Flexible to Mesoporous Polybenzoxazine Resins Templated by Poly(ethylene oxide-*b*- $\epsilon$ -caprolactone) Copolymer through Reaction Induced Microphase Separation Mechanism**

**Wei-Cheng Chu, Jheng-Guang Li, and Shiao-Wei Kuo\***

<sup>a</sup>Department of Materials and Optoelectronic Science, Center for Nanoscience and Nanotechnology,  
National Sun Yat-Sen University, Kaohsiung, 804, Taiwan

\*To whom corresponding should be addressed

E-mail: kuosw@faculty.nsysu.edu.tw

TEL: 886-7-5252000 ext.4079

FAX: 886-7-5254099

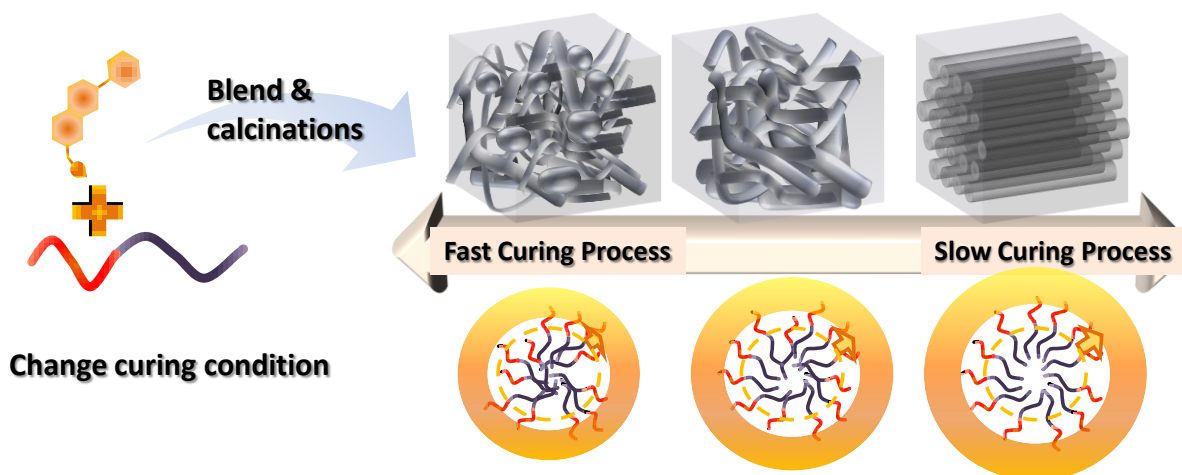

Scheme S1: The possible different mesoporous polybenzoxazine by carefully controlling curing temperature and process.

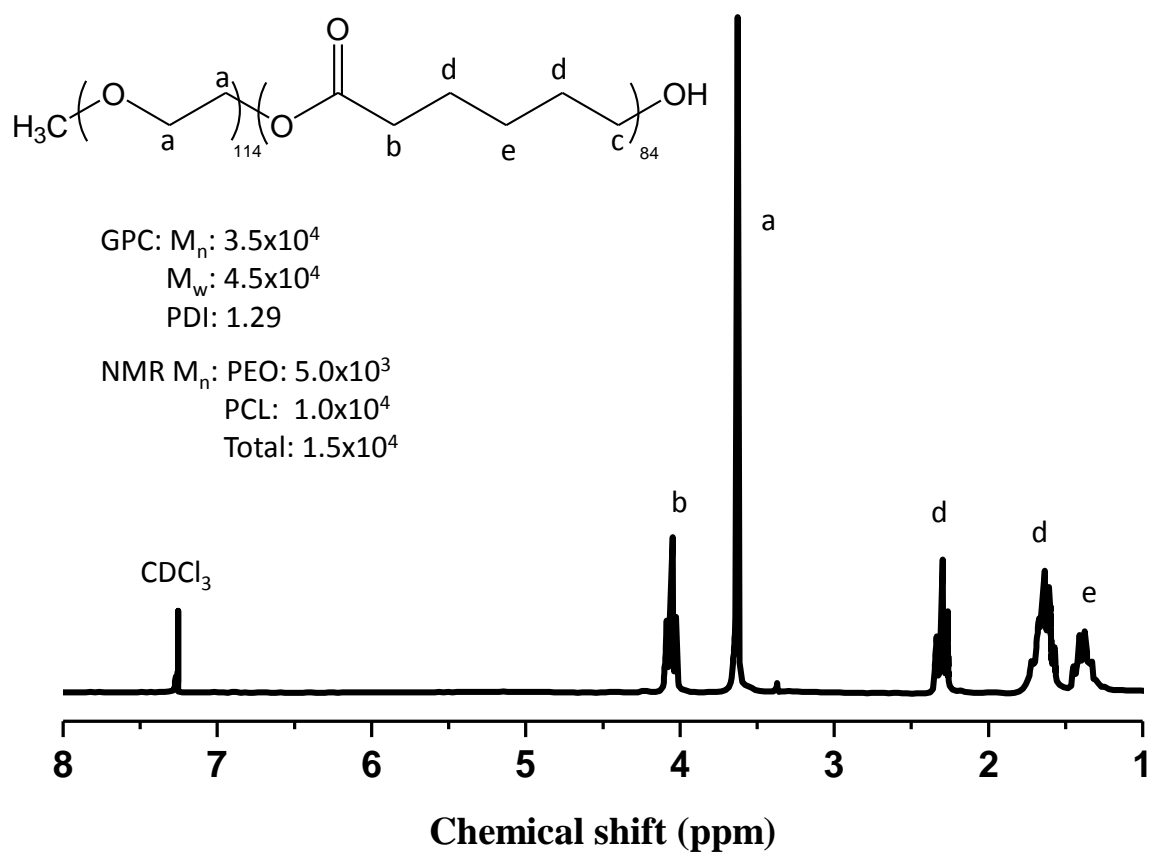

Figure S1:  $^1\text{H}$  NMR of PEO<sub>114</sub>-b-PCL<sub>88</sub> copolymer used in this study.

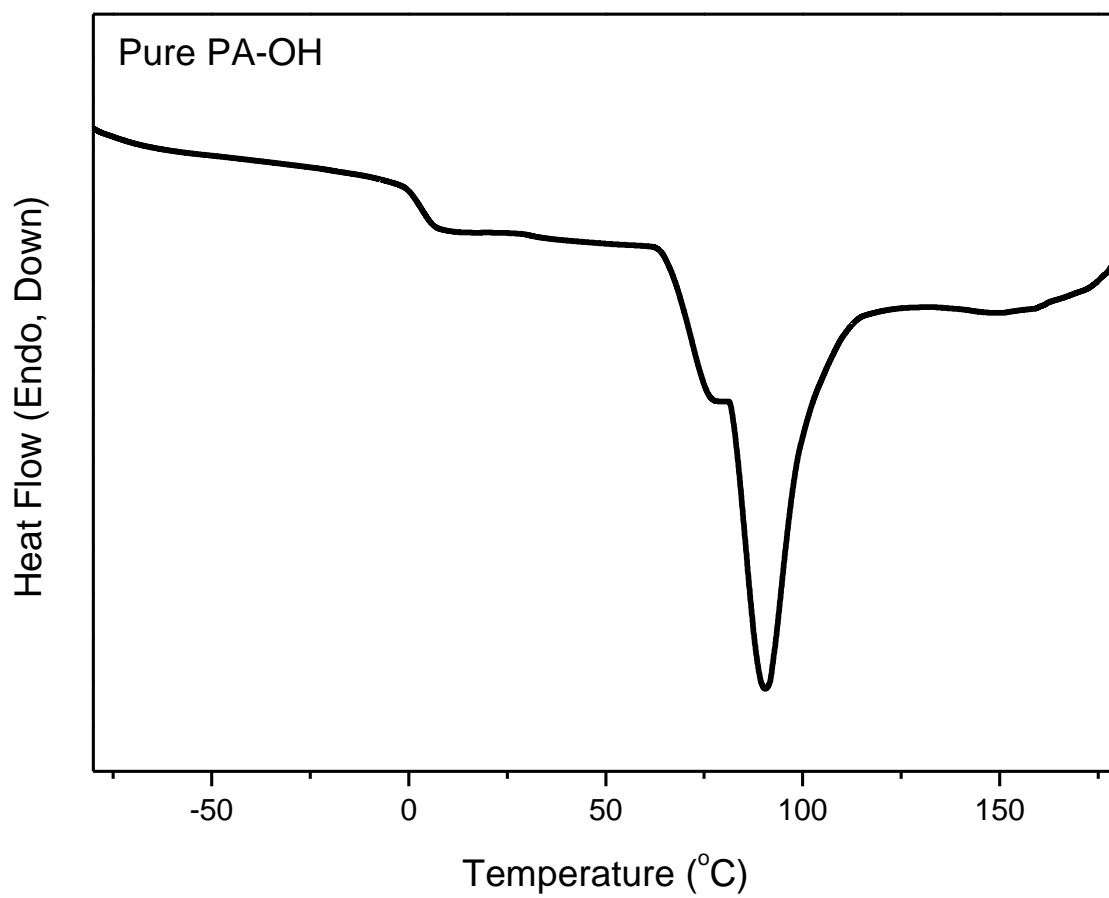

Figure S2: DSC thermogram of pure PA-OH by heating rate: 20 °C/min

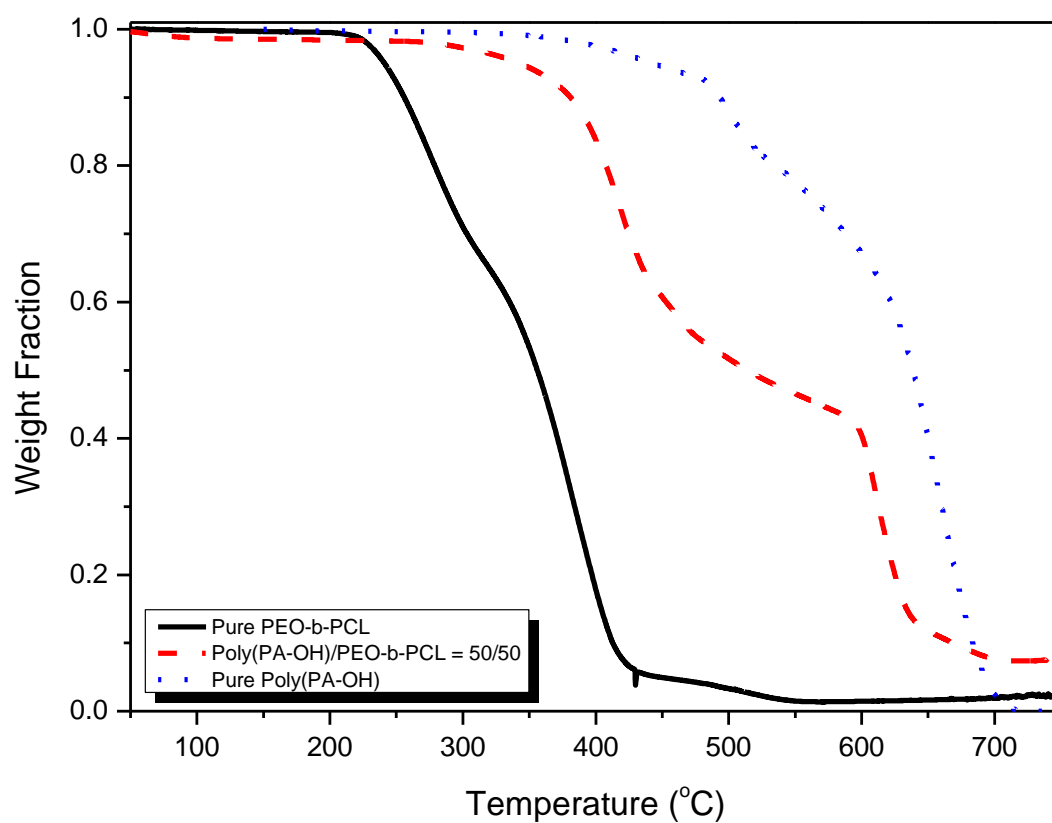

Figure S3: TGA thermograms of polybenzoxazine/PEO-*b*-PCL blends of various compositions

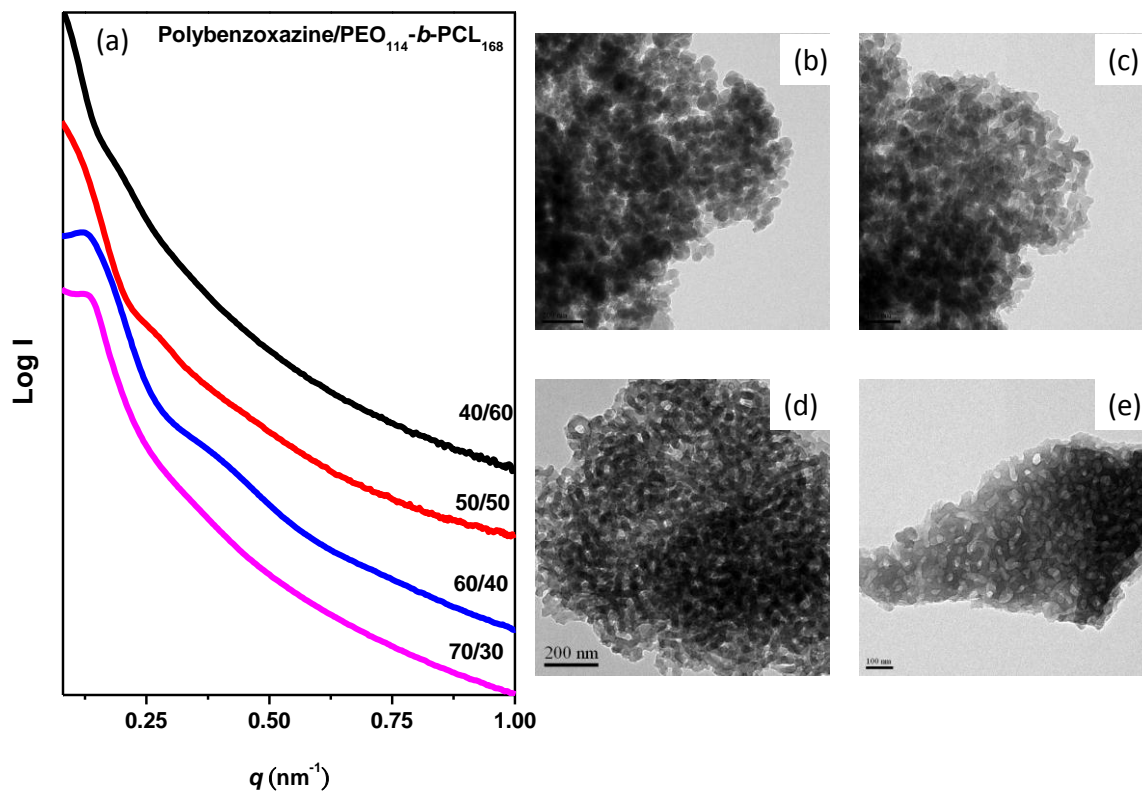

Figure S4: (a) SAXS patterns and (b–e) TEM images of mesoporous polybenzoxazine templated by  $\text{PEO}_{114}$ - $b$ - $\text{PCL}_{168}$  at weight fractions of (b) 40/60, (c) 50/50, (d) 60/40, and (e) 70/30

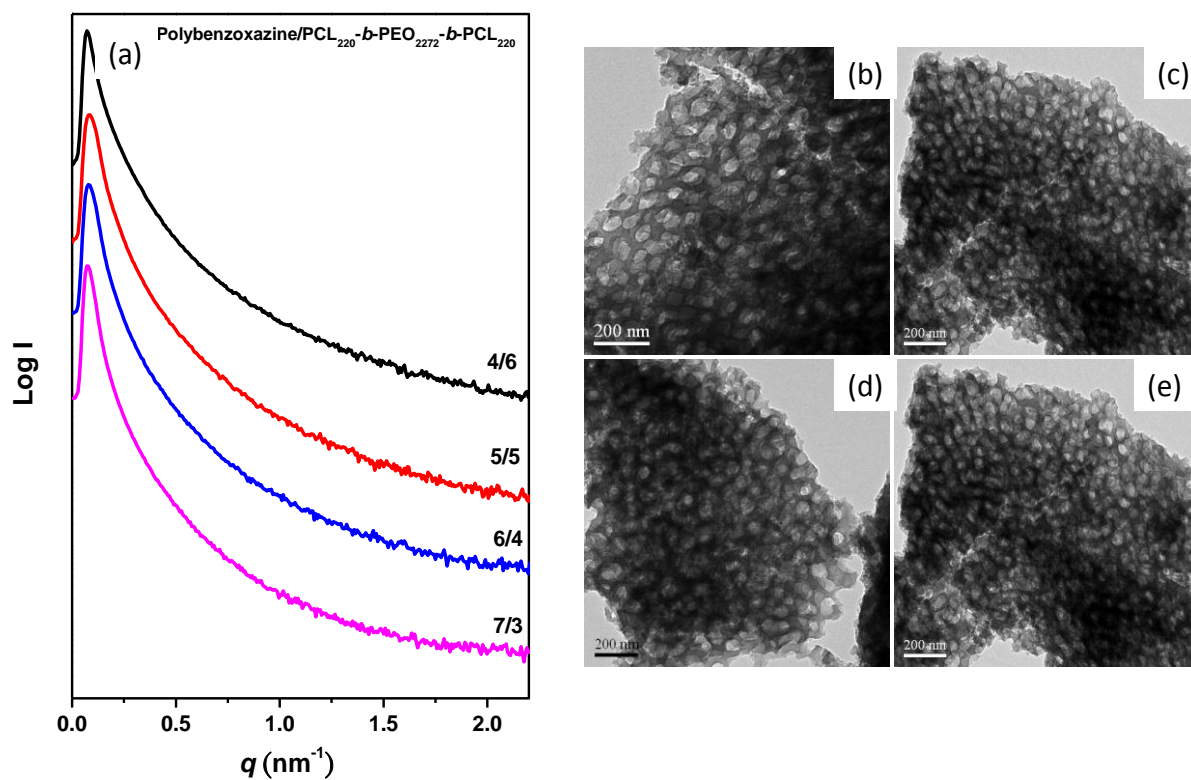

Figure S5: (a) SAXS patterns and (b–e) TEM images of mesoporous polybenzoxazine templated by PCL<sub>220</sub>-*b*-PEO<sub>2272</sub>-*b*-PCL<sub>220</sub> at weight fractions of (b) 40/60, (c) 50/50, (d) 60/40, and (e) 70/30

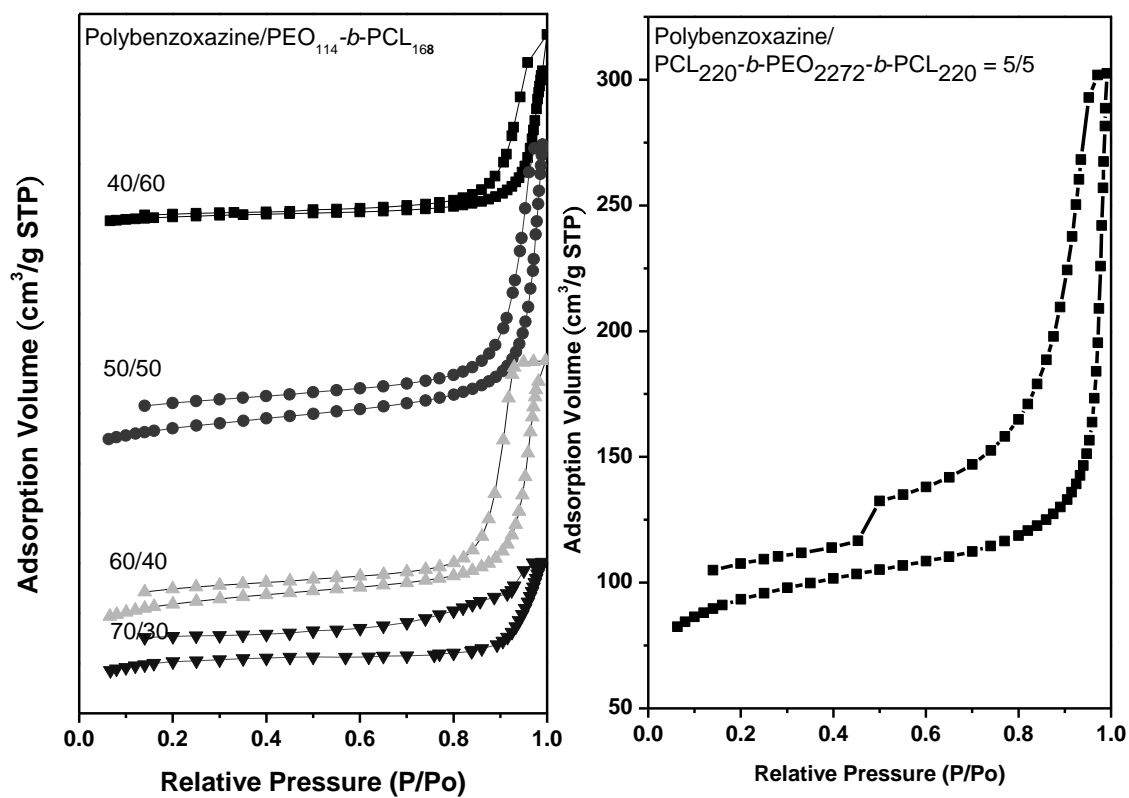

Figure S6: N<sub>2</sub> adsorption/desorption isotherms of templated by (a) PEO<sub>114</sub>-*b*-PCL<sub>168</sub> and (b) PCL<sub>220</sub>-*b*-PEO<sub>2272</sub>-*b*-PCL<sub>220</sub>.
